# Supplementary material
Source: publisher figshare collection journal article supplement (https://sage.figshare.com/ndownloader/files/14399390)
Supplement: Supplementary file 1 [file 14399390]

**Supporting Information:**

## **Monitoring the stabilities of a mixture of peptides by mass spectrometry based techniques**

Daniel R. Fuller,<sup>†</sup> Christopher R. Conant,<sup>†</sup> Tarick J. El-Baba,<sup>†</sup> Zhichao Zhang,<sup>†</sup> Kameron R. Molloy,<sup>‡</sup> Connie S. Zhang,<sup>‡</sup> David A. Hales,<sup>‡</sup> and David E. Clemmer<sup>†,\*</sup>

<sup>†</sup> Department of Chemistry, Indiana University, Bloomington, IN 47405, United States

<sup>‡</sup> Department of Chemistry, Hendrix College, Conway, AR 72032, United States

\*Correspondence: [clemmer@indiana.edu](mailto:clemmer@indiana.edu)

**Table S1.** Calculated rate constants for the dissociation of the Xaa-Pro-Gly-Gly peptides obtained from fits of the kinetics data.

| Sequence                | 70 °C                        | 80 °C                        | 90 °C                         |
|-------------------------|------------------------------|------------------------------|-------------------------------|
| <b>APGG<sup>a</sup></b> | $1.4 \pm 0.1 \times 10^{-2}$ | $3.5 \pm 0.5 \times 10^{-2}$ | $6.6 \pm 0.5 \times 10^{-2}$  |
| <b>DPGG</b>             | $1.3 \pm 0.0 \times 10^{-2}$ | $2.7 \pm 0.2 \times 10^{-2}$ | $5.1 \pm 0.5 \times 10^{-2}$  |
| <b>EPGG</b>             | $1.0 \pm 0.1 \times 10^{-2}$ | $2.3 \pm 0.1 \times 10^{-2}$ | $3.6 \pm 0.4 \times 10^{-2}$  |
| <b>FPGG<sup>a</sup></b> | $1.2 \pm 0.1 \times 10^{-2}$ | $3.3 \pm 0.3 \times 10^{-2}$ | $6.5 \pm 0.4 \times 10^{-2}$  |
| <b>GPGG<sup>a</sup></b> | $4.1 \pm 0.2 \times 10^{-3}$ | $1.1 \pm 0.2 \times 10^{-2}$ | $1.9 \pm 0.2 \times 10^{-2}$  |
| <b>HPGG</b>             | $1.2 \pm 0.1 \times 10^{-2}$ | $2.9 \pm 0.3 \times 10^{-2}$ | $6.3 \pm 0.6 \times 10^{-2}$  |
| <b>IPGG<sup>a</sup></b> | $9.9 \pm 0.5 \times 10^{-3}$ | $2.3 \pm 0.1 \times 10^{-2}$ | $4.3 \pm 0.3 \times 10^{-2}$  |
| <b>KPGG</b>             | $9.5 \pm 0.3 \times 10^{-3}$ | $2.1 \pm 0.2 \times 10^{-2}$ | $1.2 \pm 0.2 \times 10^{-1}$  |
| <b>LPGG<sup>a</sup></b> | $1.3 \pm 0.0 \times 10^{-2}$ | $4.0 \pm 0.3 \times 10^{-2}$ | $9.0 \pm 1.0 \times 10^{-2}$  |
| <b>MPGG</b>             | $8.7 \pm 0.3 \times 10^{-3}$ | $2.7 \pm 0.3 \times 10^{-2}$ | $4.6 \pm 0.6 \times 10^{-2}$  |
| <b>NPGG</b>             | $1.3 \pm 0.1 \times 10^{-2}$ | $2.9 \pm 0.5 \times 10^{-2}$ | $5.6 \pm 1.0 \times 10^{-2}$  |
| <b>PPGG<sup>a</sup></b> | $7.4 \pm 0.5 \times 10^{-3}$ | $1.6 \pm 0.2 \times 10^{-2}$ | $3.3 \pm 0.6 \times 10^{-2}$  |
| <b>QPGG</b>             | $3.4 \pm 0.7 \times 10^{-2}$ | $9.1 \pm 0.8 \times 10^{-2}$ | $1.8 \pm 0.3 \times 10^{-1}$  |
| <b>RPGG</b>             | $1.5 \pm 0.2 \times 10^{-2}$ | $3.8 \pm 0.7 \times 10^{-2}$ | $15.4 \pm 5.6 \times 10^{-2}$ |
| <b>SPGG<sup>a</sup></b> | $1.6 \pm 0.1 \times 10^{-2}$ | $3.2 \pm 0.3 \times 10^{-2}$ | $7.2 \pm 1.2 \times 10^{-2}$  |
| <b>TPGG<sup>a</sup></b> | $1.5 \pm 0.2 \times 10^{-2}$ | $3.4 \pm 0.1 \times 10^{-2}$ | $6.2 \pm 0.6 \times 10^{-2}$  |
| <b>VPGG<sup>a</sup></b> | $9.5 \pm 0.2 \times 10^{-3}$ | $2.2 \pm 0.1 \times 10^{-2}$ | $4.9 \pm 0.3 \times 10^{-2}$  |
| <b>WPGG</b>             | $5.0 \pm 0.5 \times 10^{-3}$ | $1.2 \pm 0.1 \times 10^{-2}$ | $3.3 \pm 0.1 \times 10^{-2}$  |
| <b>YPGG</b>             | $4.6 \pm 0.5 \times 10^{-3}$ | $8.7 \pm 0.3 \times 10^{-3}$ | $2.2 \pm 0.3 \times 10^{-2}$  |

<sup>a</sup> Signifies peptides which were fit best by including an intermediate step prior to dissociation.

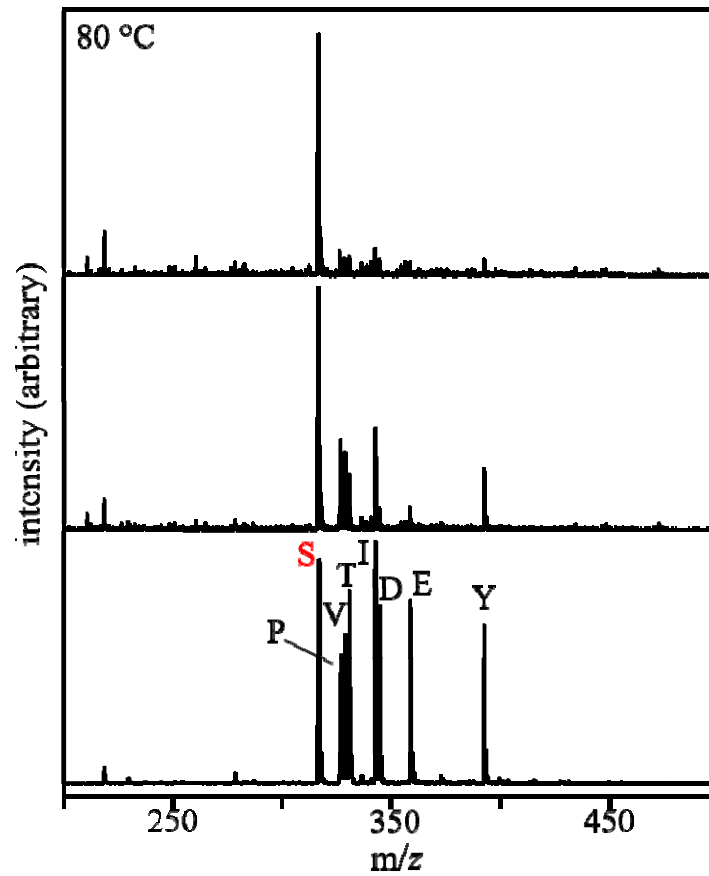

**Figure S1.** Representative mass spectral distributions for a mixture of XPGG peptides at 80 °C. The peaks in the 0 min distribution are labeled by the first residue in the sequence with the red label indicating the internal standard used in the experiment.

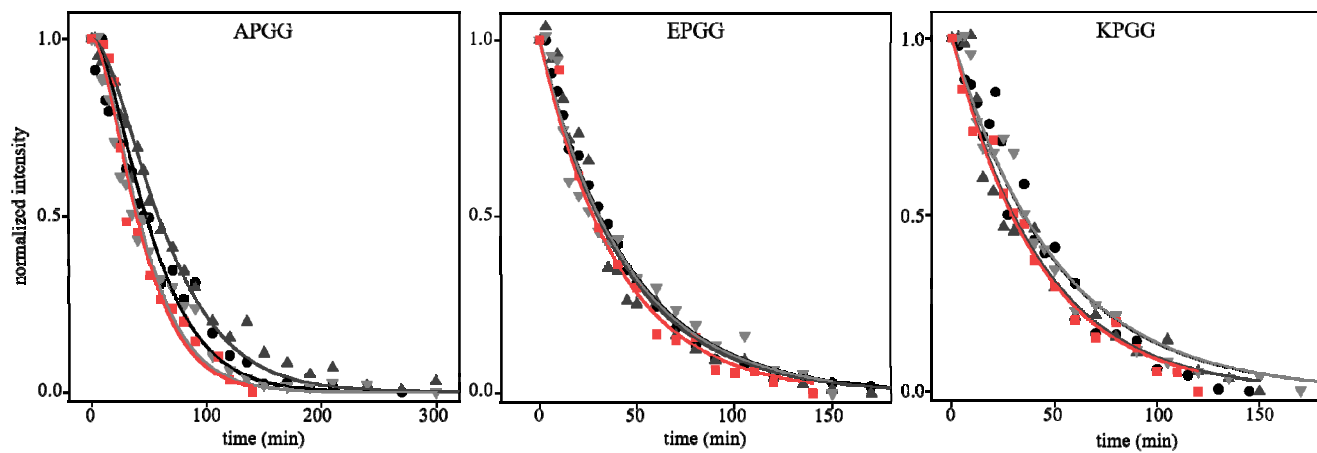

**Figure S2.** Kinetics plots for APGG, EPGG, and KPGG at 80 °C. Black, dark gray, and gray symbols and lines for each system represent the kinetics plots from the peptides run as part of a mixture, and red symbols and lines represent the peptide run individually to check whether rates were influenced in the mixture.

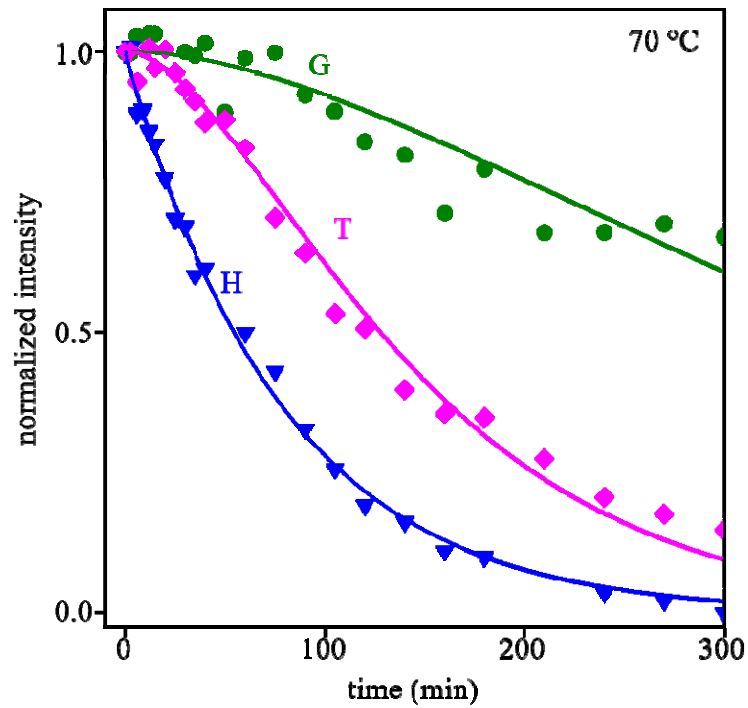

**Figure S3.** Kinetics plots of the early time points shown for three different peptides (GPGG, TPGG, and HPGG) at 70 °C to better demonstrate the difference between peptides which demonstrate a lag time (GPGG and TPGG) and a peptide which doesn't (HPGG). The relative intensities are plotted as a function of time.

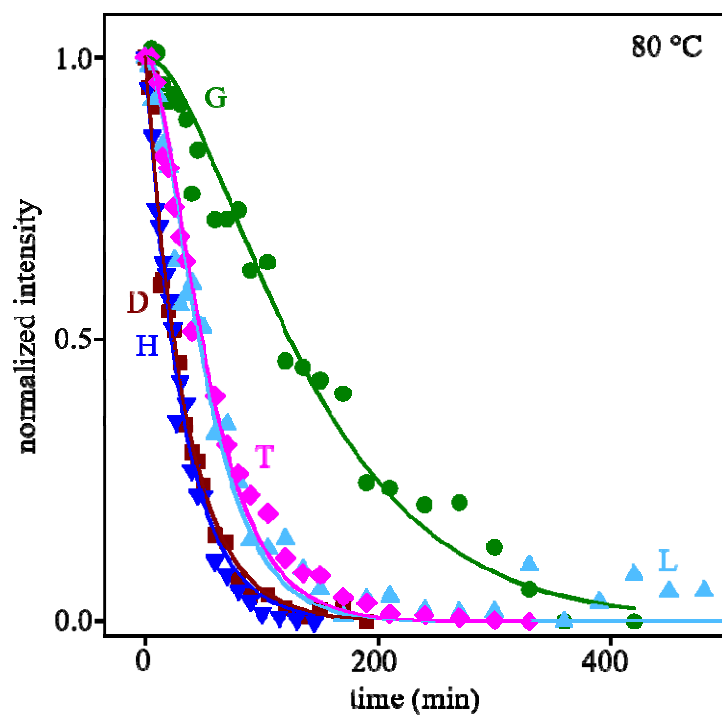

**Figure S4.** Kinetics plots shown for five different XPGG peptides (DPGG, HPGG, TPGG, LPGG, and GPGG) at 80 °C, incubated in a n-propanol:0.5% acetic acid solution. The relative intensities are plotted as a function of time.

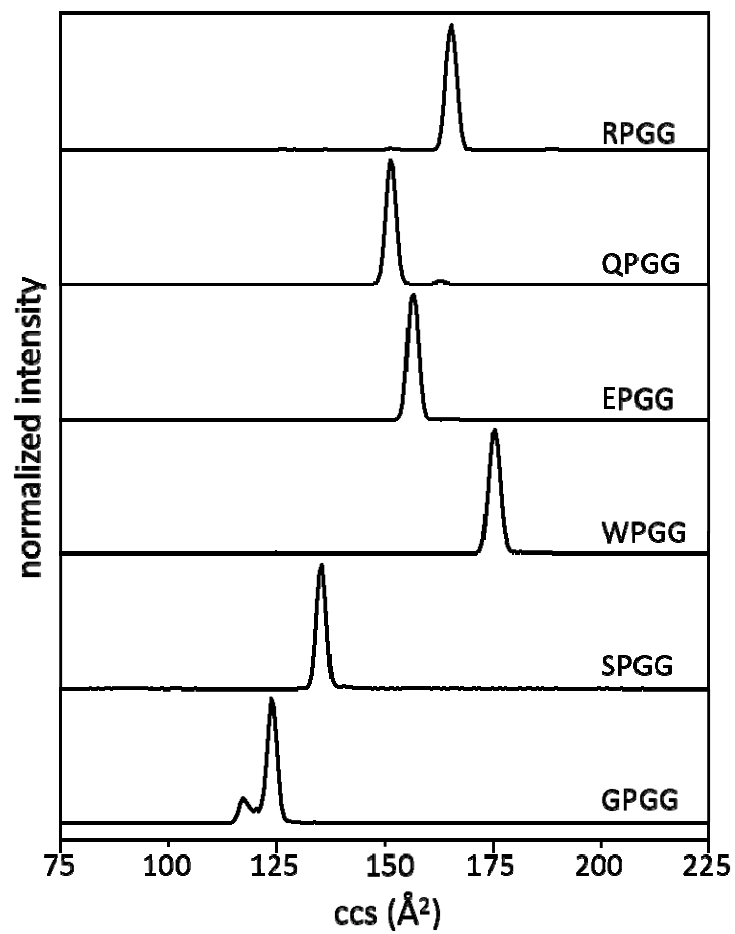

**Figure S5.** Collision cross sections distributions of a few of the peptides studied. One peptide from each of the groups (Figure 4) is shown. A small second peak is observed for almost all of the peptides studied which we associate with *cis/trans* isomerization of the Xaa-Pro bond.
